# Supplementary material for: Strongyloides stercoralis: Spatial distribution of a highly prevalent and ubiquitous soil-transmitted helminth in Cambodia
Source: PubMed Central journal article supplement (PMC6586258; doi:10.1371/journal.pntd.0006943), 2019-06-20
Supplement: pntd.0006943.s002.pdf [file pntd.0006943.s002.pdf]

**S2 Table. Results of the bivariate non-spatial regressions for individual-level risk factors**

| <b>Variable</b>                                            | <b>Category</b>          | <b>OR</b> | <b>95% CI</b> | <b>LRT p-value</b> |
|------------------------------------------------------------|--------------------------|-----------|---------------|--------------------|
| Sex                                                        | Male                     | 1.00      | -             | 0.8695             |
|                                                            | Female                   | 1.01      | 0.9 -1.12     |                    |
| Age group (years)                                          | 6 - 12                   | 1.00      | -             | < 0.0001           |
|                                                            | 13 - 18                  | 1.8       | 1.47-2.21     |                    |
|                                                            | 19 - 30                  | 2.29      | 1.89-2.77     |                    |
|                                                            | 31 - 50                  | 3.38      | 2.86-3.99     |                    |
|                                                            | ≥ 50                     | 4.8       | 4.03-5.72     |                    |
| Usual defecation place                                     | Toilet                   | 1.00      | -             | 0.0287             |
|                                                            | Forest                   | 1.15      | 1.00-1.33     |                    |
|                                                            | River, rice field, other | 1.29      | 1.03-1.62     |                    |
| Education attainment                                       | Primary                  | 1.00      | -             | < 0.0001           |
|                                                            | No school                | 1.81      | 1.57-2.09     |                    |
|                                                            | Secondary                | 1.17      | 1.01-1.35     |                    |
|                                                            | High school and higher   | 0.97      | 0.78-1.21     |                    |
| Main occupation                                            | Farmer                   | 1.00      | -             | < 0.0001           |
|                                                            | At school                | 0.38      | 0.34-0.43     |                    |
|                                                            | At home                  | 0.76      | 0.58-0.99     |                    |
|                                                            | Other                    | 0.8       | 0.65-0.99     |                    |
| Number of household members                                | -                        | 0.99      | 0.96-1.01     | 0.2517             |
| Do you know anything about worms?                          | No                       | 1.00      | -             | < 0.0001           |
|                                                            | Yes                      | 1.29      | 1.14-1.46     |                    |
| Do you know how to get infected with worms?                | No                       | 1.00      | -             | 0.0491             |
|                                                            | Yes                      | 1.13      | 1.00-1.27     |                    |
| Do you know what health problems worm infection can cause? | No                       | 1.00      | -             | 0.1043             |
|                                                            | Yes                      | 1.11      | 0.98-1.25     |                    |
| Source of infection: walking barefoot <sup>(a)</sup>       | No                       | 1.00      | -             | 0.6909             |
|                                                            | Yes                      | 0.97      | 0.83-1.13     |                    |
| Source of infection: lack of hygiene <sup>(a)</sup>        | No                       | 1.00      | -             | 0.8795             |
|                                                            | Yes                      | 0.99      | 0.87-1.13     |                    |
| Source of infection: open defecation <sup>(a)</sup>        | No                       | 1.00      | -             | 0.4313             |
|                                                            | Yes                      | 1.06      | 0.91-1.24     |                    |
| Source of infection: no handwashing <sup>(a)</sup>         | No                       | 1.00      | -             | 0.6236             |
|                                                            | Yes                      | 1.04      | 0.90-1.20     |                    |

<sup>(a)</sup> spontaneous specific answers to the question "Do you know how to get infected with worms"?

Data were obtained from a cross-sectional survey conducted in 2016 among 7,246 participants living in 249 villages across the 25 provinces of Cambodia
