# Supplementary material for: Strongyloides stercoralis: Spatial distribution of a highly prevalent and ubiquitous soil-transmitted helminth in Cambodia
Source: PubMed Central journal article supplement (PMC6586258; doi:10.1371/journal.pntd.0006943), 2019-06-20
Supplement: pntd.0006943.s003.pdf [file pntd.0006943.s003.pdf]

# Nation-wide Mapping of Intestinal Helminth Infection in Cambodia, 2016

## IDENTIFICATION

|                                                                  |                                                  |
|------------------------------------------------------------------|--------------------------------------------------|
| 1 Date of interview:  ____ ____ .  ____ ____ . 2016 (dd/mm/yyyy) | Participant IDCODE<br><br>00-00-00<br>PRO-VIL-PP |
| 2 Household number:  __ __  3- Village: _____ 4- Commune: _____  |                                                  |
| 5 District: _____ 6- Province _____                              |                                                  |
| 7 Respondent's Name _____                                        |                                                  |

## DEMOGRAPHICS

|                                                                                                                         |
|-------------------------------------------------------------------------------------------------------------------------|
| 8 Age of Respondent:  ____ ____  years                                                                                  |
| 9 Sex of Respondent: <input type="checkbox"/> 1-Male <input type="checkbox"/> 2-Female                                  |
| 10 Occupation of Respondent?  ____  1-Farmer; 2-Student; 3-Fisherman; 4-Teacher; 5-Other<br>a If OTHER, Specify: _____  |
| 11 Education level of Respondent?  ____  0-No School; 1-Primary School; 2-Secondary School; 3-High School; 4-University |
| 12 How many persons live together with you in the house?  ____  ____  persons                                           |

## PERSONAL DISEASE & RISK-PERCEPTION

|                                                                                                                                                                                                                                                                                                     |
|-----------------------------------------------------------------------------------------------------------------------------------------------------------------------------------------------------------------------------------------------------------------------------------------------------|
| 13 Do you know anything about worms or infection with worms? <input type="checkbox"/> 1-Yes <input type="checkbox"/> 0-No <b>If NO, Skip to 16</b>                                                                                                                                                  |
| 14 Do you know how you get infected with worms? <input type="checkbox"/> 1-Yes <input type="checkbox"/> 0-No <b>If NO, Skip to 15</b><br>If YES, please, describe (Do not read or prompt the answer AND Multiple answer is possible)                                                                |
| a Unboiled Water <input type="checkbox"/> 1-Yes <input type="checkbox"/> 0-Not Reported f Not washing hands <input type="checkbox"/> 1-Yes <input type="checkbox"/> 0-Not Reported                                                                                                                  |
| b Swimming <input type="checkbox"/> 1-Yes <input type="checkbox"/> 0-Not Reported g Undercooked fish <input type="checkbox"/> 1-Yes <input type="checkbox"/> 0-Not Reported                                                                                                                         |
| c Bare foot <input type="checkbox"/> 1-Yes <input type="checkbox"/> 0-Not Reported h Undercooked meat <input type="checkbox"/> 1-Yes <input type="checkbox"/> 0-Not Reported                                                                                                                        |
| d Lack of hygiene <input type="checkbox"/> 1-Yes <input type="checkbox"/> 0-Not Reported i Undercooked vegetables <input type="checkbox"/> 1-Yes <input type="checkbox"/> 0-Not Reported                                                                                                            |
| e Defecate outside toilet <input type="checkbox"/> 1-Yes <input type="checkbox"/> 0-Not Reported j Other, Specify: _____                                                                                                                                                                            |
| 15 Do you know what health problems can occur because of a worm infection? <input type="checkbox"/> 1-Yes <input type="checkbox"/> 0-No <b>If NO, Skip to 16</b><br>If YES, please, describe (Do not read or prompt the answer AND Multiple answer is possible)                                     |
| a Skin problems <input type="checkbox"/> 1-Yes <input type="checkbox"/> 0-Not Reported e Vomit blood <input type="checkbox"/> 1-Yes <input type="checkbox"/> 0-Not Reported                                                                                                                         |
| b Muscle pain <input type="checkbox"/> 1-Yes <input type="checkbox"/> 0-Not Reported f Vomiting <input type="checkbox"/> 1-Yes <input type="checkbox"/> 0-Not Reported                                                                                                                              |
| c Big belly <input type="checkbox"/> 1-Yes <input type="checkbox"/> 0-Not Reported g Diarrhea <input type="checkbox"/> 1-Yes <input type="checkbox"/> 0-Not Reported                                                                                                                                |
| d Stomach/abdominal pain <input type="checkbox"/> 1-Yes <input type="checkbox"/> 0-Not Reported h Loss of weight <input type="checkbox"/> 1-Yes <input type="checkbox"/> 0-Not Reported                                                                                                             |
| i Other, Specify: _____                                                                                                                                                                                                                                                                             |
| 16 When (which month of this year) did you receive the anthelmintic drug (MBZ/ABZ/PZQ)? _____                                                                                                                                                                                                       |
| 17 Do you have toilet at home? <input type="checkbox"/> 1-Yes <input type="checkbox"/> 0-No <input type="checkbox"/> 9-DK <b>If NO or DK, Skip to 18</b><br>a is it inside or outside the house? <input type="checkbox"/> 1-Inside <input type="checkbox"/> 2-Outside <input type="checkbox"/> 9-DK |
| 18 Where do you usually defecate?  ____  1-In Toilet; 2-Forest; 3-In River; 4-Rice Field; 5-Other<br>a Other, Specify: _____                                                                                                                                                                        |
