# Supplementary material for: Strongyloides stercoralis: Spatial distribution of a highly prevalent and ubiquitous soil-transmitted helminth in Cambodia
Source: PubMed Central journal article supplement (PMC6586258; doi:10.1371/journal.pntd.0006943), 2019-06-20
Supplement: pntd.0006943.s004.pdf [file pntd.0006943.s004.pdf]

## Appendix S2: Bayesian Model Formulation

For the individual level risk factor analysis we assumed the infection status  $Y_{ij}$  of an individual  $i$  at a village  $j$  followed a Bernoulli distribution:  $Y_{ij} \sim \text{Be}(p_{ij})$  where  $p_{ij}$  is the probability of being infected by *S. stercoralis* for an individual  $i$  in a village  $j$ .

For the predictive model using environmental variables at village level only we assumed that at each village  $j$ , the number of infected  $Y_j$  followed a Binomial distribution:  $Y_j \sim \text{Bin}(N_j, p_j)$  where  $N_j$  is the number of screened individuals and  $p_j$  is the probability of infection.

Spatial random effects  $\phi_j$ , accounted for unobserved spatial processes at every village  $j$ .

Covariates  $\beta_k$  and random effects  $\phi_j$  were modelled on a logit scale:

$\text{logit}(p_{ij}) = \alpha + \sum_{k=1}^n \beta_k X_{kij} + \phi_j$ , with  $n$  being the number of covariates. The random effect

$\underline{\phi} = (\phi_1, \phi_2, \dots, \phi_j)^T$  is assumed to follow a Normal distribution  $\underline{\phi} \sim N(0, \Sigma)$ , where  $\Sigma$  is the

covariance matrix. A stationary isotropic process was assumed in the present work, with the

covariance matrix  $\Sigma_{ij} = \sigma^2 \text{corr}_{ij}(d_{ij}, \rho)$  and an exponential correlation function

$\text{corr}_{ij}(d_{ij}, \rho) = \exp(-d_{ij}, \rho)$  where  $d_{ij}$  is the shortest distance between two locations  $s_i$  and  $s_j$ ,

and  $\rho$  is a measure of how spatial correlation decreases with the distance. The distance at

which the spatial correlation between villages gets under 5% is equal to  $3/\rho$  and is called the

range.

According to Bayesian modelling specification, we chose prior distributions for all parameters

to be estimated. We chose a Normal distribution with a mean of zero and a variance of 100 for

the regression coefficients. An inverse gamma vague prior with mean equal to 1 and variance

equal to 100 was adopted for  $\sigma^2$ , and a uniform prior for  $\rho$  with parameters calculated as a

function of the minimum and maximum distance between sampled villages:
